# Supplementary material for: Comparison of CAGE and RNA-seq transcriptome profiling using clonally amplified and single-molecule next-generation sequencing
Source: HighWire-hosted journal article supplement (doi:10.1101/gr.156232.113), 2014-03-27
Supplement: Supplemental_Table.xlsx [file Supplemental_Table.xlsx]

## Sheet: Suppl table1
platform	RNA_name	THP1:HeLa ratio	replicate	library ID	sample ID	barcode	mapped reads
RNA-seq	RA	100%:0%	rep01	RNig10097	2855-61G3	no	17554451
RNA-seq	RA	100%:0%	rep02	RNig10098	2855-61G3	no	16826769
RNA-seq	RA	100%:0%	rep03	RNig10100	2855-61G3	no	8694248
RNA-seq	RB	99%:1%	rep01	RNig10101	2995-62B7	no	16302058
RNA-seq	RB	99%:1%	rep02	RNig10102	2995-62B7	no	16158023
RNA-seq	RB	99%:1%	rep03	RNig10103	2995-62B7	no	12381771
RNA-seq	RE	50%:50%	rep01	RNig10104	2995-62H8	no	14887057
RNA-seq	RE	50%:50%	rep02	RNig10105	2995-62H8	no	8107056
RNA-seq	RE	50%:50%	rep03	RNig10106	2995-62H8	no	10420360
RNA-seq	RF	0%:100%	rep01	RNig10094	2990-64E1	no	14158104
RNA-seq	RF	0%:100%	rep02	RNig10095	2990-64E1	no	10405136
RNA-seq	RF	0%:100%	rep03	RNig10096	2990-64E1	no	9725135
HeliScopeCAGE	RA	100%:0%	rep01	CNhs10333	2855-61D3	no	5749168
HeliScopeCAGE	RA	100%:0%	rep02	CNhs10341	2855-61D3	no	8112049
HeliScopeCAGE	RA	100%:0%	rep03	CNhs10349	2855-61D3	no	9355194
HeliScopeCAGE	RB	99%:1%	rep01	CNhs10334	2995-62A7	no	5997282
HeliScopeCAGE	RB	99%:1%	rep02	CNhs10342	2995-62A7	no	7473439
HeliScopeCAGE	RB	99%:1%	rep03	CNhs10350	2995-62A7	no	10328557
HeliScopeCAGE	RC	95%:5%	rep01	CNhs10335	2995-62I7	no	5798161
HeliScopeCAGE	RC	95%:5%	rep02	CNhs10343	2995-62I7	no	7133744
HeliScopeCAGE	RC	95%:5%	rep03	CNhs10351	2995-62I7	no	9531603
HeliScopeCAGE	RD	90%:10%	rep01	CNhs10336	2995-62D8	no	5106907
HeliScopeCAGE	RD	90%:10%	rep02	CNhs10344	2995-62D8	no	8679959
HeliScopeCAGE	RD	90%:10%	rep03	CNhs10352	2995-62D8	no	6675608
HeliScopeCAGE	RE	50%:50%	rep01	CNhs10337	2995-62H8	no	5907977
HeliScopeCAGE	RE	50%:50%	rep02	CNhs10345	2995-62H8	no	8926380
HeliScopeCAGE	RE	50%:50%	rep03	CNhs10353	2995-62H8	no	8315638
HeliScopeCAGE	RF	0%:100%	rep01	CNhs10338	2990-64E1	no	2774431
HeliScopeCAGE	RF	0%:100%	rep02	CNhs10346	2990-64E1	no	7702008
HeliScopeCAGE	RF	0%:100%	rep03	CNhs10354	2990-64E1	no	9617832
IlluminaCAGE	RA	100%:0%	rep01	J20-DA	2855-61F3	ACA	1063020
IlluminaCAGE	RA	100%:0%	rep02	J20-DA	2855-61F3	ACT	754312
IlluminaCAGE	RA	100%:0%	rep03	J20-DA	2855-61F3	ACG	549116
IlluminaCAGE	RA	100%:0%	rep04	J20-DA	2855-61F3	ATC	363098
IlluminaCAGE	RA	100%:0%	rep05	J20-DA	2855-61F3	ATG	265581
IlluminaCAGE	RA	100%:0%	rep06	J20-DA	2855-61F3	AGC	362012
IlluminaCAGE	RB	99%:1%	rep01	J21-DA	2995-62A7	ACA	955658
IlluminaCAGE	RB	99%:1%	rep02	J48-DA	2995-62B7	ACA	449407
IlluminaCAGE	RB	99%:1%	rep03	J49-DA	2995-62B7	ACA	470152
IlluminaCAGE	RC	95%:5%	rep01	J21-DA	2995-62I7	ACT	844270
IlluminaCAGE	RC	95%:5%	rep02	J48-DA	2995-62I7	ACT	325766
IlluminaCAGE	RC	95%:5%	rep03	J49-DA	2995-62I7	ACT	387565
IlluminaCAGE	RD	90%:10%	rep01	J21-DA	2995-62D8	ACG	723266
IlluminaCAGE	RD	90%:10%	rep02	J48-DA	2995-62D8	ACG	418369
IlluminaCAGE	RD	90%:10%	rep03	J49-DA	2995-62D8	ACG	400571
IlluminaCAGE	RE	50%:50%	rep01	J21-DA	2995-62H8	ATC	444866
IlluminaCAGE	RE	50%:50%	rep02	J48-DA	2995-62H8	ATC	214812
IlluminaCAGE	RE	50%:50%	rep03	J49-DA	2995-62H8	ATC	227941
IlluminaCAGE	RF	0%:100%	rep01	J21-DA	2990-64E1	ATG	228676
IlluminaCAGE	RF	0%:100%	rep02	J48-DA	2990-64E1	ATG	267664
IlluminaCAGE	RF	0%:100%	rep03	J49-DA	2990-64E1	ATG	268466

## Sheet: Suppl table 2
chrom	start	stop	name	score	strand	manual inspection
chr1	70384927	70385128	chr1:70385027..70385028,+	0	+	unclassifieble
chr1	144948723	144948924	chr1:144948823..144948824,-	0	-	T rich
chr1	195388257	195388458	chr1:195388357..195388358,-	0	-	T rich
chr1	224045061	224045262	chr1:224045161..224045162,-	0	-	G start
chr10	127356112	127356313	chr10:127356212..127356213,-	0	-	G start
chr11	12530520	12530721	chr11:12530620..12530621,+	0	+	T rich
chr12	82538799	82539000	chr12:82538899..82538900,-	0	-	G start
chr12	120637115	120637316	chr12:120637215..120637216,-	0	-	unclassifieble
chr13	36354035	36354236	chr13:36354135..36354136,-	0	-	G start, T rich
chr15	71771428	71771629	chr15:71771528..71771529,+	0	+	T rich
chr15	71771429	71771630	chr15:71771529..71771530,+	0	+	T rich
chr15	72432187	72432388	chr15:72432287..72432288,-	0	-	G start
chr15	79528410	79528611	chr15:79528510..79528511,+	0	+	T rich
chr16	5415595	5415796	chr16:5415695..5415696,+	0	+	G start
chr16	89007728	89007929	chr16:89007828..89007829,-	0	-	G start
chr17	75259306	75259507	chr17:75259406..75259407,+	0	+	unclassifieble
chr19	5576862	5577063	chr19:5576962..5576963,-	0	-	G start
chr2	240212	240413	chr2:240312..240313,-	0	-	unclassifieble
chr2	45750331	45750532	chr2:45750431..45750432,-	0	-	unclassifieble
chr2	45750332	45750533	chr2:45750432..45750433,-	0	-	G start
chr2	171608117	171608318	chr2:171608217..171608218,+	0	+	G start
chr21	26734009	26734210	chr21:26734109..26734110,+	0	+	G start
chr21	26734011	26734212	chr21:26734111..26734112,+	0	+	unclassifieble
chr3	4555696	4555897	chr3:4555796..4555797,-	0	-	T rich
chr3	64546898	64547099	chr3:64546998..64546999,+	0	+	T rich
chr3	172965636	172965837	chr3:172965736..172965737,+	0	+	T rich
chr3	186314651	186314852	chr3:186314751..186314752,+	0	+	G start
chr3	193859222	193859423	chr3:193859322..193859323,+	0	+	G start
chr5	31923327	31923528	chr5:31923427..31923428,+	0	+	G start
chr6	147727483	147727684	chr6:147727583..147727584,+	0	+	unclassifieble
chr7	11995598	11995799	chr7:11995698..11995699,-	0	-	G start, T rich
chr7	27498394	27498595	chr7:27498494..27498495,-	0	-	G start
chr8	9477201	9477402	chr8:9477301..9477302,+	0	+	T rich
chr9	81284393	81284594	chr9:81284493..81284494,-	0	-	T rich
chrX	79113514	79113715	chrX:79113614..79113615,+	0	+	G start, T rich

## Sheet: Suppl table3
gene	forward primer	reverse primer
CPS1	CCGAGGCCCATGCCACAAATCA	GGAGCCTGATGCCAGGTCTTGA
TM4SF1	TGTGGCAAACGATGTGCGATGC	TGCACTCGGACCATGTGGAGGT
TIMP4	GGCTGCCAAATCACCACCTGCT	GCTGCAGGTGCCGTCAACAT
